# Supplementary material for: Disrupting HIV‐1 capsid formation causes cGAS sensing of viral DNA
Source: PubMed Central journal article supplement (PMC7560218; doi:10.15252/embj.2019103958), 2020-08-27

**Fig 1A**

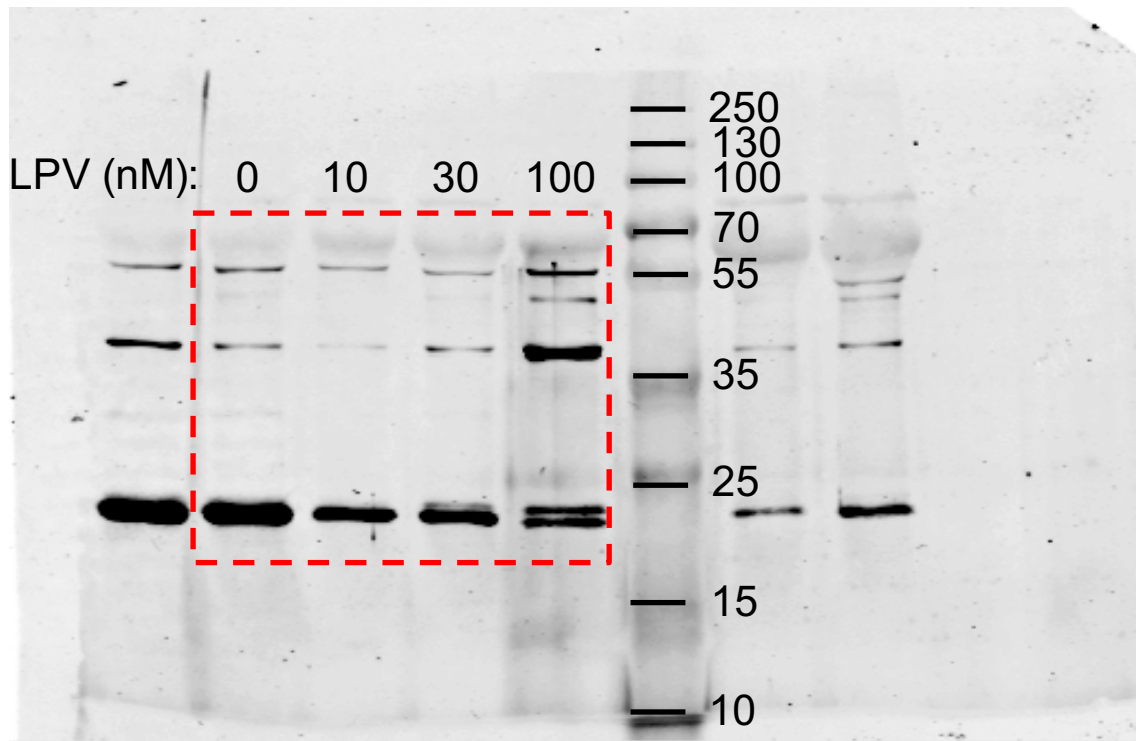

**Fig 1J**

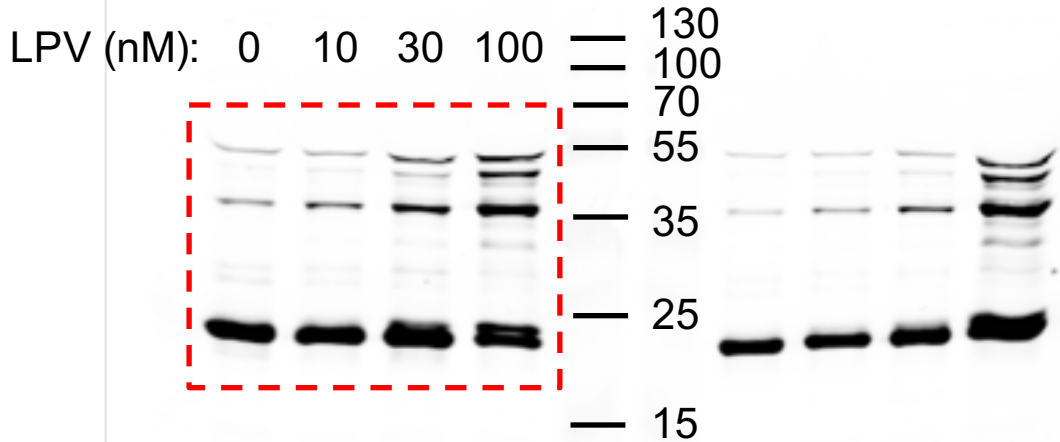

Supplement: EMBJ-39-e103958-s003.pdf [file EMBJ-39-e103958-s003.pdf]
