# Supplementary material for: Disrupting HIV‐1 capsid formation causes cGAS sensing of viral DNA
Source: EMBO J. 2020 Aug 27;39(20):e103958. doi: 10.15252/embj.2019103958 (PMC7560218; doi:10.15252/embj.2019103958)
Supplement: Supplementary file 2 — Expanded View Figures PDF [file EMBJ-39-e103958-s002.pdf]

## Expanded View Figures

### Figure EV1. PI treatment induces HIV-1 to trigger an ISG response in macrophages.

- A Schematic of intermediate Gag cleavage products. MA: matrix, CA: capsid, SP1: spacer peptide 1, NC: nucleocapsid, SP2: spacer peptide 2.
- B Infection data from Fig 1D–G. PMA-treated THP-1 shSAMHD1 cells transduced for 48 h with LPV-treated HIV-1 GFP viruses (0.1 U RT/ml or 0.5 U RT/ml).
- C Immunoblot of HIV-1 GFP virus particles ( $2 \times 10^{11}$  genomes) produced with darunavir (DRV, 0–50 nM) detecting p24.
- D Titration of DRV-treated HIV-1 GFP viruses on U87 cells. Mean  $\pm$  SD,  $n = 3$ .
- E Infection data from (F, G).
- F IRF reporter activity from PMA-treated THP-1 Dual shSAMHD1 cells transduced for 24 h with DRV-treated HIV-1 GFP ( $1 \times 10^{10}$  genomes/ml).
- G CXCL-10 protein in supernatant from (F) (ELISA).
- H ISG qRT-PCR from PMA-treated THP-1 shSAMHD1 cells transduced for 24 h with 0.2 U RT/ml 30 nM LPV-treated HIV-1 GFP in the presence of DMSO vehicle or 2  $\mu$ M ruxolitinib. A control was stimulated with 1 ng/ml IFN $\beta$ .
- I, J Titration of LPV-treated HIV-1 R9 BaL viruses on primary MDM. Collated data (mean  $\pm$  SD,  $n = 3$ ) represented as percentage titre normalised to R9 BaL produced in the absence of LPV (0 nM) are in (I) and data from individual donors are in (J).
- K CXCL-10 protein in supernatant of primary MDM 48 h post-transduction with WT HIV-1 GFP or DRV-treated (12.5 nM) HIV-1 GFP ( $6 \times 10^7$  genomes/ml or  $3 \times 10^8$  genomes/ml) in the presence of DMSO vehicle or 2  $\mu$ M ruxolitinib.
- L Infection data from (K).

Data information: Data are mean  $\pm$  SD,  $n = 3$ , representative of 2 repeats (E–H, K, L) or 3 repeats (B). Statistical analyses were performed using the Student's *t*-test, with Welch's correction where appropriate and comparing to the 0 nM DRV condition. \**P* < 0.05, \*\**P* < 0.01.

Source data are available online for this figure.

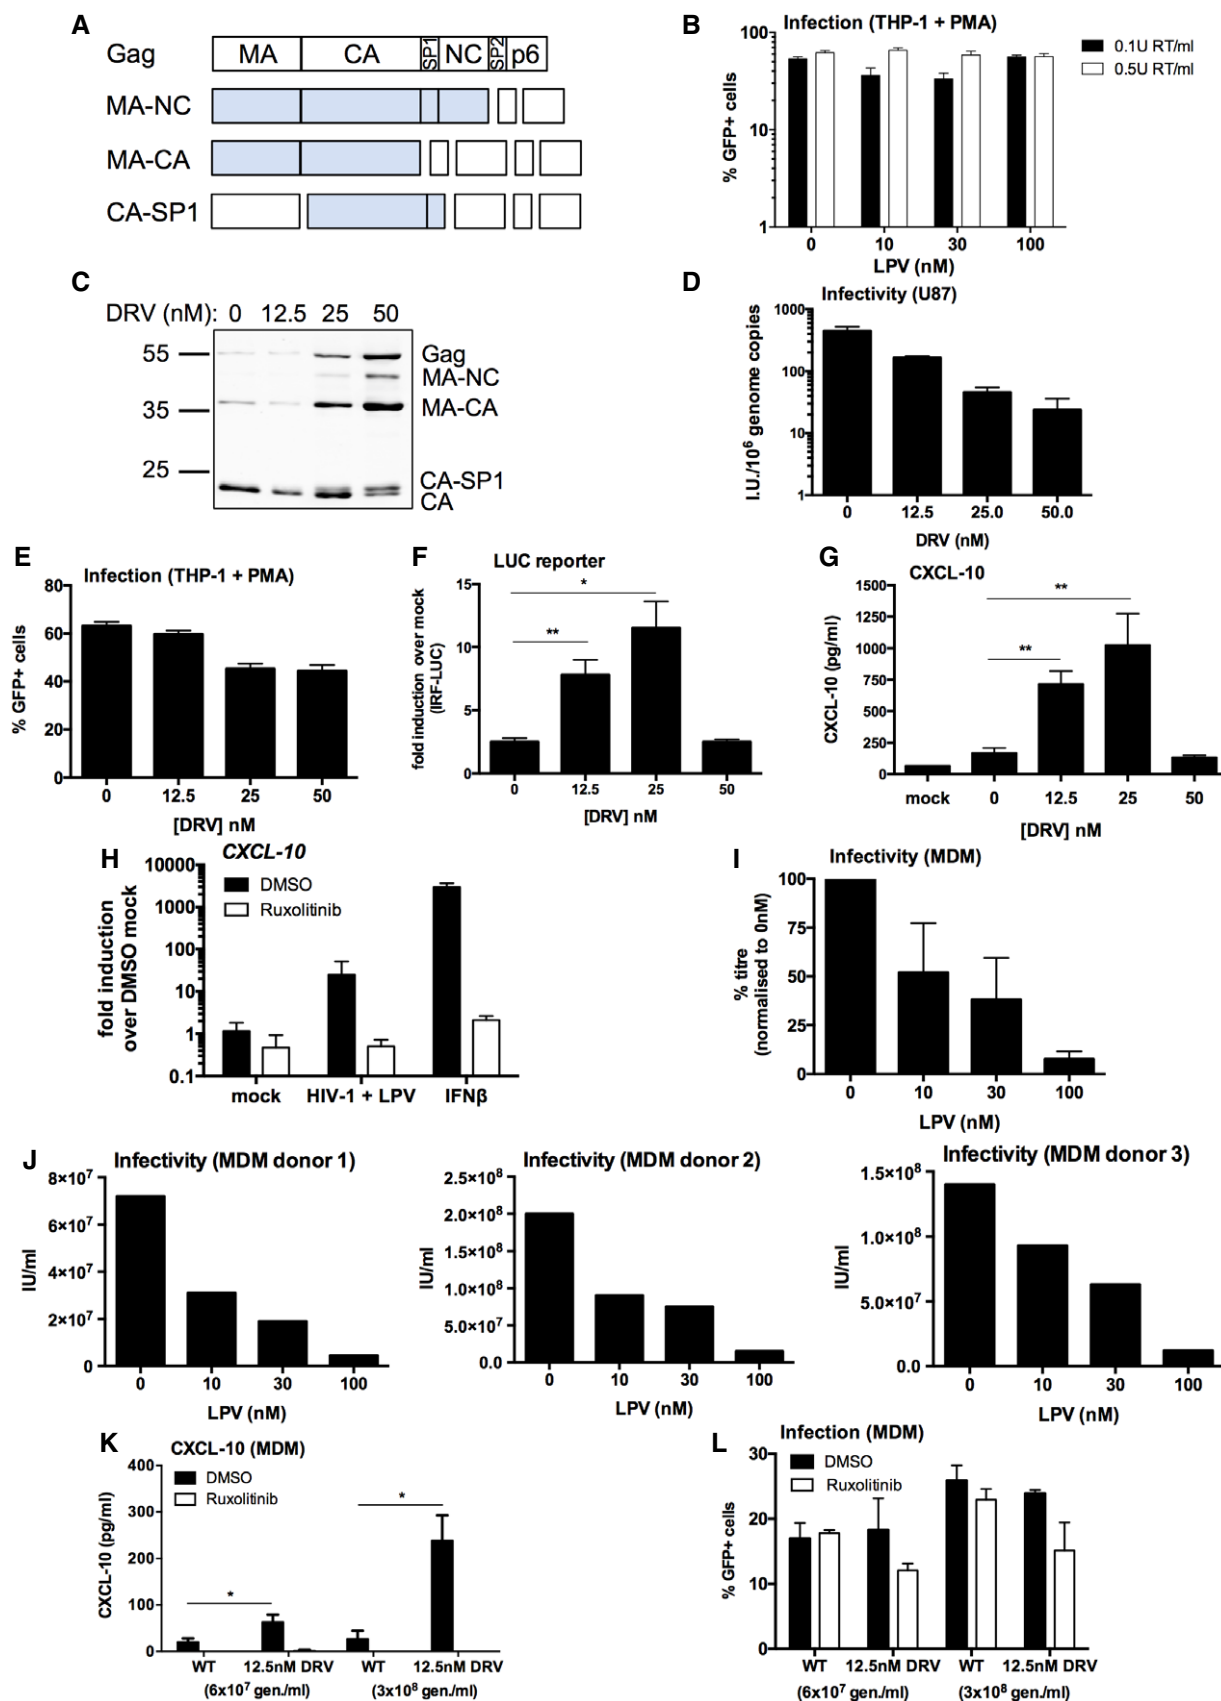

Figure EV1.

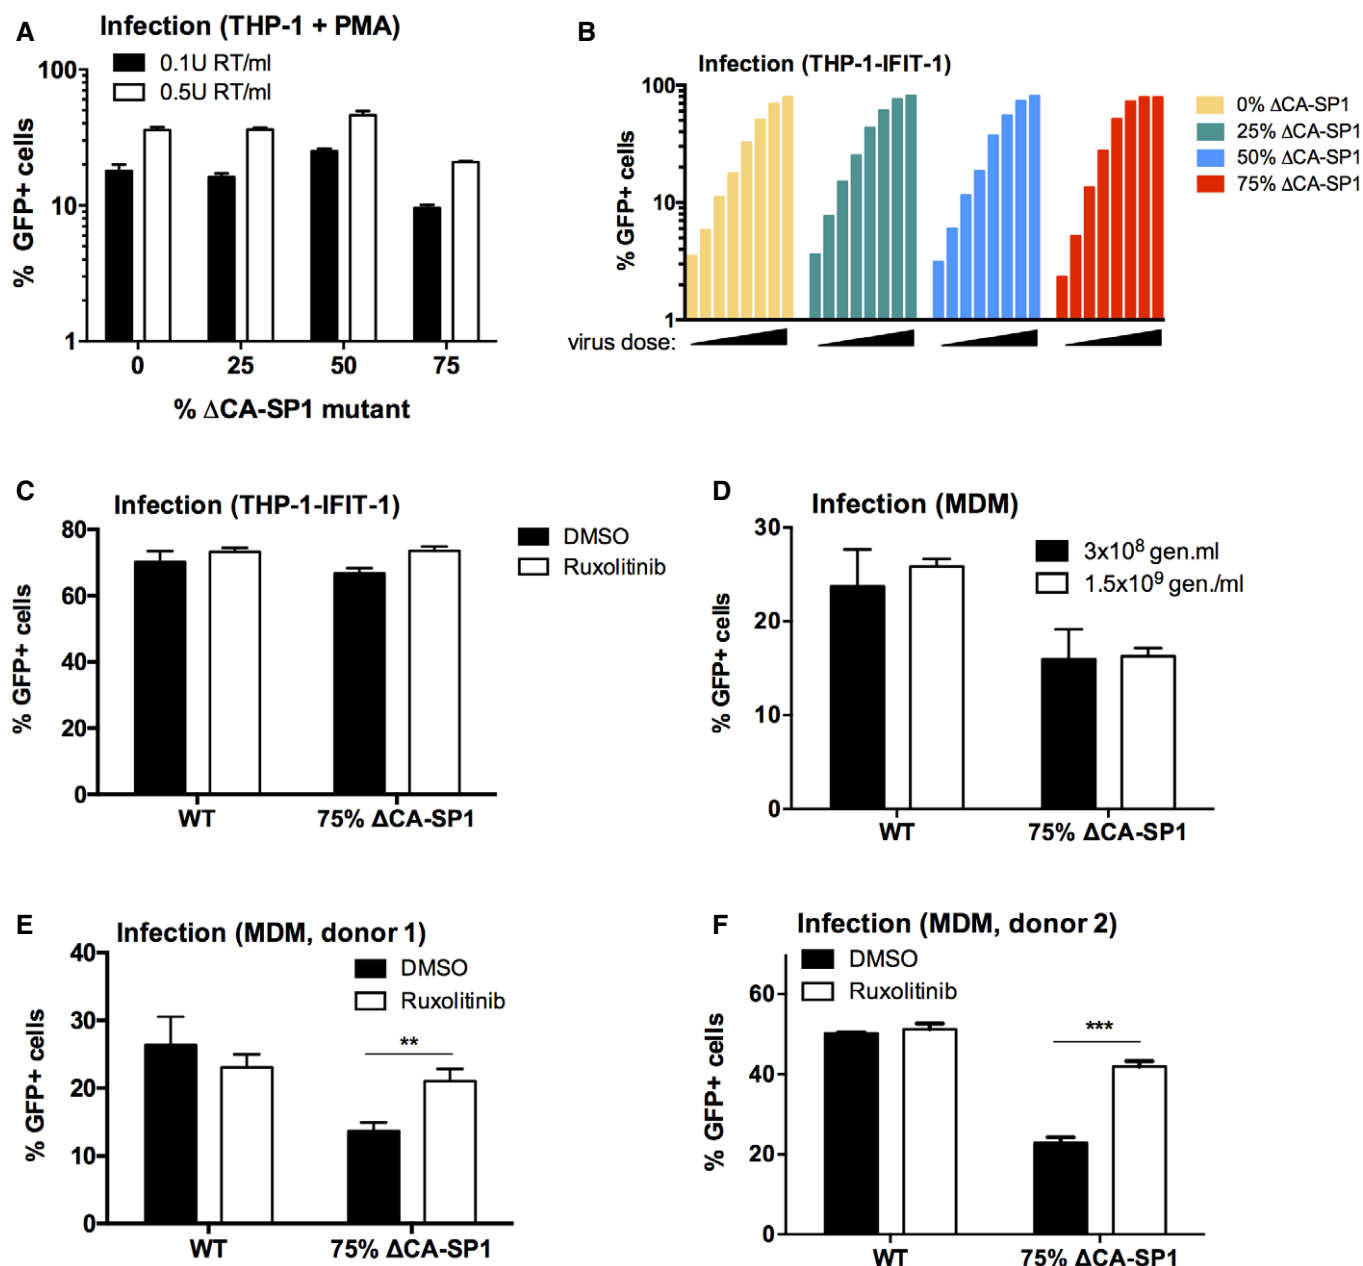

**Figure EV2. HIV-1 with Gag protease cleavage mutation induces ISGs in macrophages.**

A Infection levels of cells from Fig 2C–E. PMA-treated THP-1 shSAMHD1 cells transduced for 48 h with HIV-1 GFP  $\Delta$ CA-SP1 viruses (0.1 U RT/ml or 0.5 U RT/ml).

B Infection data from Fig 2G. THP-1-IFIT-1 cells transduced for 48 h with HIV-1 GFP  $\Delta$ CA-SP1 viruses (0.016–0.2 U RT/ml).

C Infection data from Fig 2H. THP-1-IFIT-1 cells transduced for 48 h with HIV-1 GFP containing either 0% (WT) or 75%  $\Delta$ CA-SP1 mutant in the presence of DMSO vehicle or 2  $\mu$ M ruxolitinib.

D Infection data from Fig 2I. Primary MDM transduced for 48 h with WT HIV-1 GFP or 75%  $\Delta$ CA-SP1 mutant ( $3 \times 10^8$  genomes/ml or  $1.5 \times 10^9$  genomes/ml).

E Infection data from Fig 2J and K. Primary MDM transduced for 48 h with WT HIV-1 GFP or 75%  $\Delta$ CA-SP1 mutant ( $1.5 \times 10^9$  genomes/ml) in the presence of DMSO vehicle or 2  $\mu$ M ruxolitinib.

F Repeat of (E) in a second donor.

Data information: Data are individual measurements (B) or mean  $\pm$  SD,  $n = 3$  (A, C–F), representative of 2 repeats. Statistical analyses were performed using Student's *t*-test, with Welch's correction where appropriate and comparing to the DMSO control. \*\* $p < 0.01$ , \*\*\* $p < 0.001$ .

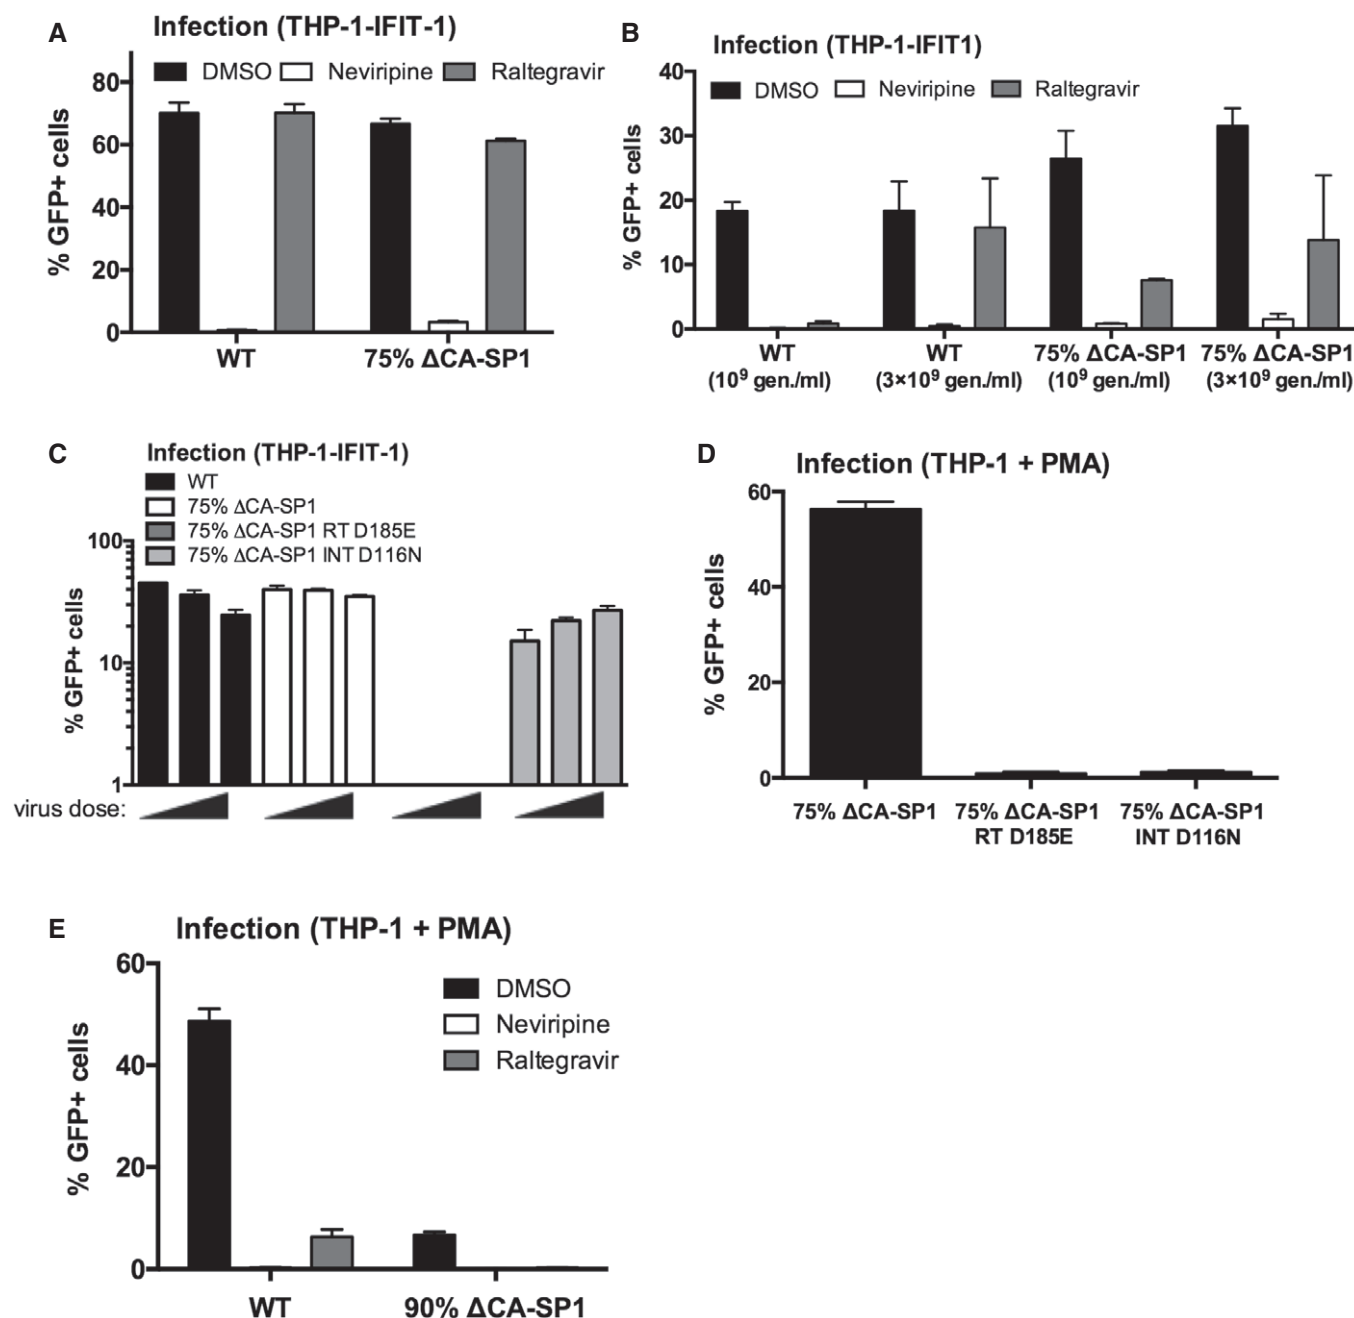

**Figure EV3. Innate immune activation is RT-dependent.**

- A Infection data from Fig 3A and B. THP-1-IFIT-1 cells transduced for 48 h with HIV-1 GFP containing 0% (WT) or 75% ΔCA-SP1 mutant (1 U RT/ml) in the presence of DMSO vehicle, 5 μM nevirapine or 10 μM raltegravir.
- B Infection data for Fig 3C and D. THP-1-IFIT-1 cells transduced for 48 h with 0% (WT) or 75% ΔCA-SP1 mutant (10<sup>9</sup> and 3 × 10<sup>9</sup> genomes/ml) in the presence of DMSO vehicle, 5 μM nevirapine or 10 μM raltegravir.
- C Infection data for Fig 3E and F. THP-1-IFIT-1 cells transduced for 48 h with HIV-1 GFP containing 0% ΔCA-SP1 (WT), 75% ΔCA-SP1, 75% ΔCA-SP1 carrying a mutation in reverse transcriptase (75% ΔCA-SP1 RT D185E) or 75% ΔCA-SP1 carrying a mutation in integrase (75% ΔCA-SP1 INT D116N) (3.75 × 10<sup>9</sup>, 7.5 × 10<sup>9</sup> and 1.5 × 10<sup>10</sup> genomes/ml).
- D Infection data for PMA-treated THP-1 Dual shSAMHD1 cells transduced for 48 h with 75% ΔCA-SP1, 75% ΔCA-SP1 RT D185E or 75% ΔCA-SP1 INT D116N (3 × 10<sup>9</sup> genomes/ml).
- E Infection data for PMA-treated THP-1 Dual shSAMHD1 control cells transduced for 48 h with WT HIV-1 GFP or 90% ΔCA-SP1 mutant (1 × 10<sup>10</sup> genomes/ml) in the presence of DMSO vehicle, 5 μM nevirapine or 10 μM raltegravir.

Data information: Data are mean ± SD, *n* = 3, representative of 2 repeats.

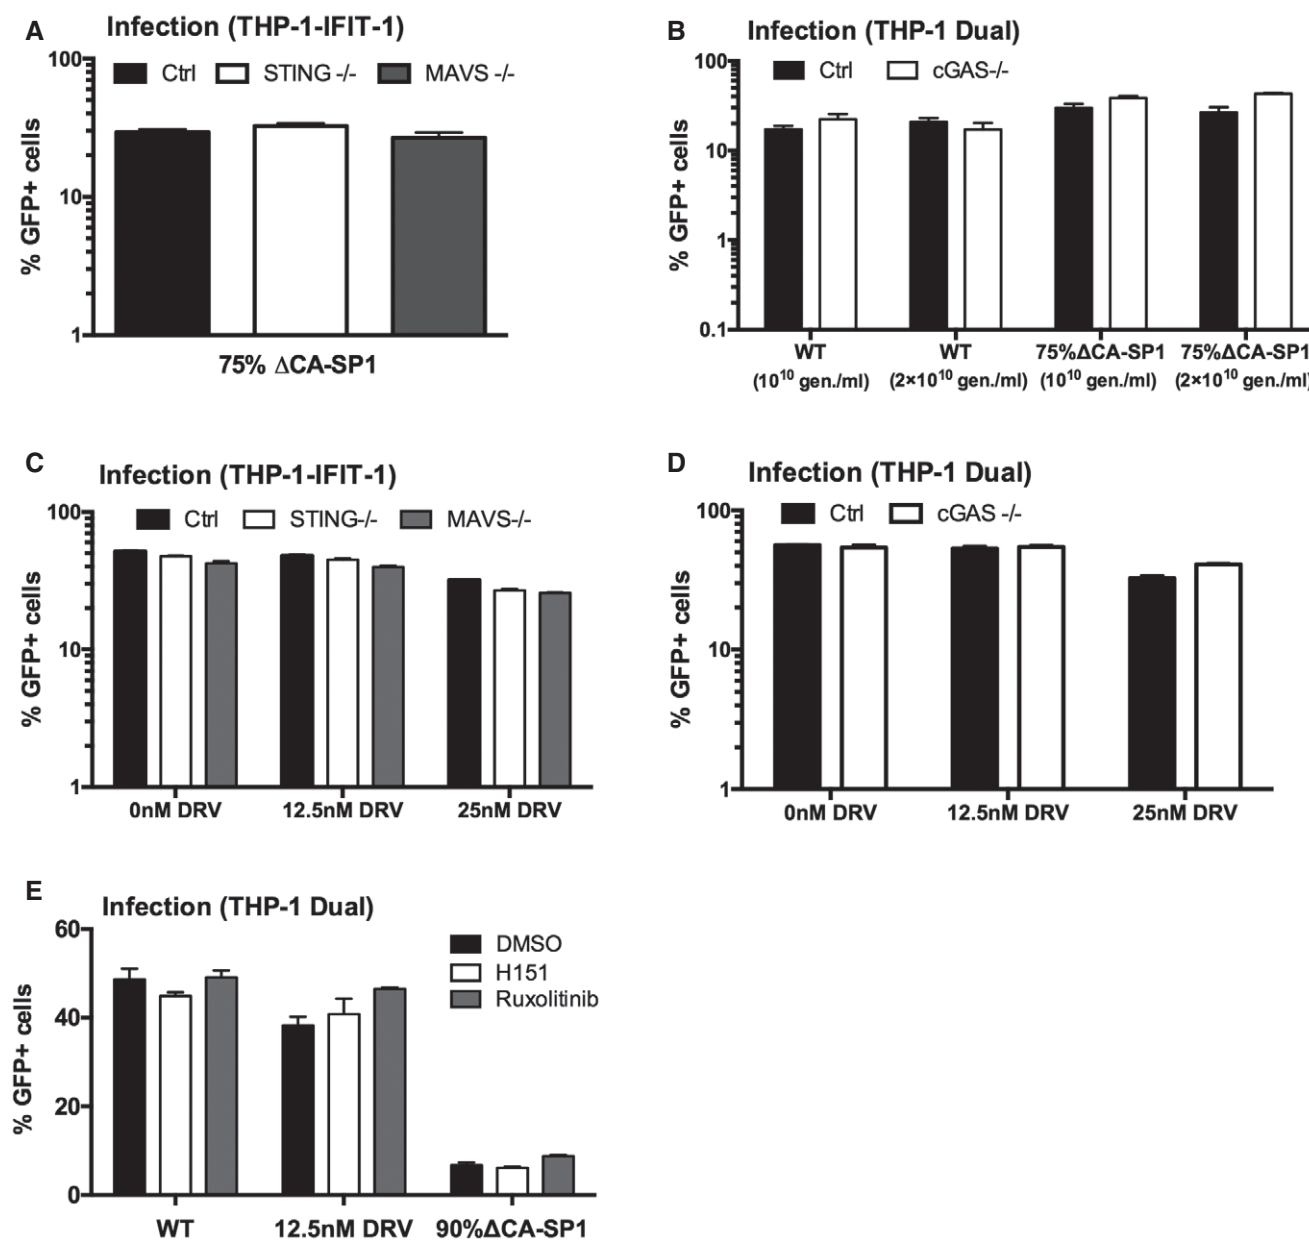

**Figure EV4. Innate immune activation is DNA sensing-dependent.**

- A Infection data from Fig 4A. PMA-treated THP-1-IFIT-1 shSAMHD1 cells lacking STING or MAVS, or a gRNA control (Ctrl) cell line transduced for 48 h with HIV-1 GFP 75%  $\Delta$ CA-SP1 (0.4 U RT/ml).
- B Infection data from Fig 4C and D. PMA-treated THP-1 Dual shSAMHD1 cells lacking cGAS or a matching control (Ctrl) cell line transduced for 48 h with HIV-1 GFP containing either 0% (WT) or 75%  $\Delta$ CA-SP1 ( $1 \times 10^{10}$  and  $2 \times 10^{10}$  genomes/ml).
- C Infection data from Fig 4E and G. PMA-treated THP-1-IFIT-1 shSAMHD1 cells lacking STING, MAVS or matching gRNA control (Ctrl) cell lines transduced for 48 h with DRV-treated HIV-1 GFP ( $1 \times 10^{10}$  genomes/ml).
- D Infection data from Fig 4F and H. PMA-treated THP-1 Dual shSAMHD1 cells lacking cGAS or matching control (Ctrl) cell lines transduced for 48 h with DRV-treated HIV-1 GFP ( $1 \times 10^{10}$  genomes/ml).
- E Infection data from Fig 4I. PMA-treated THP-1 Dual shSAMHD1 control cells transduced for 48 h with WT, DRV-treated (DRV, 12.5 nM) or HIV-1 GFP 90%  $\Delta$ CA-SP1 ( $1 \times 10^{10}$  genomes/ml) in the presence of DMSO vehicle, 2  $\mu$ M ruxolitinib or 0.5  $\mu$ g/ml H151.

Data information: Data are mean  $\pm$  SD,  $n = 3$ , representative of 2 (C–E) or 3 (A, B) repeats.

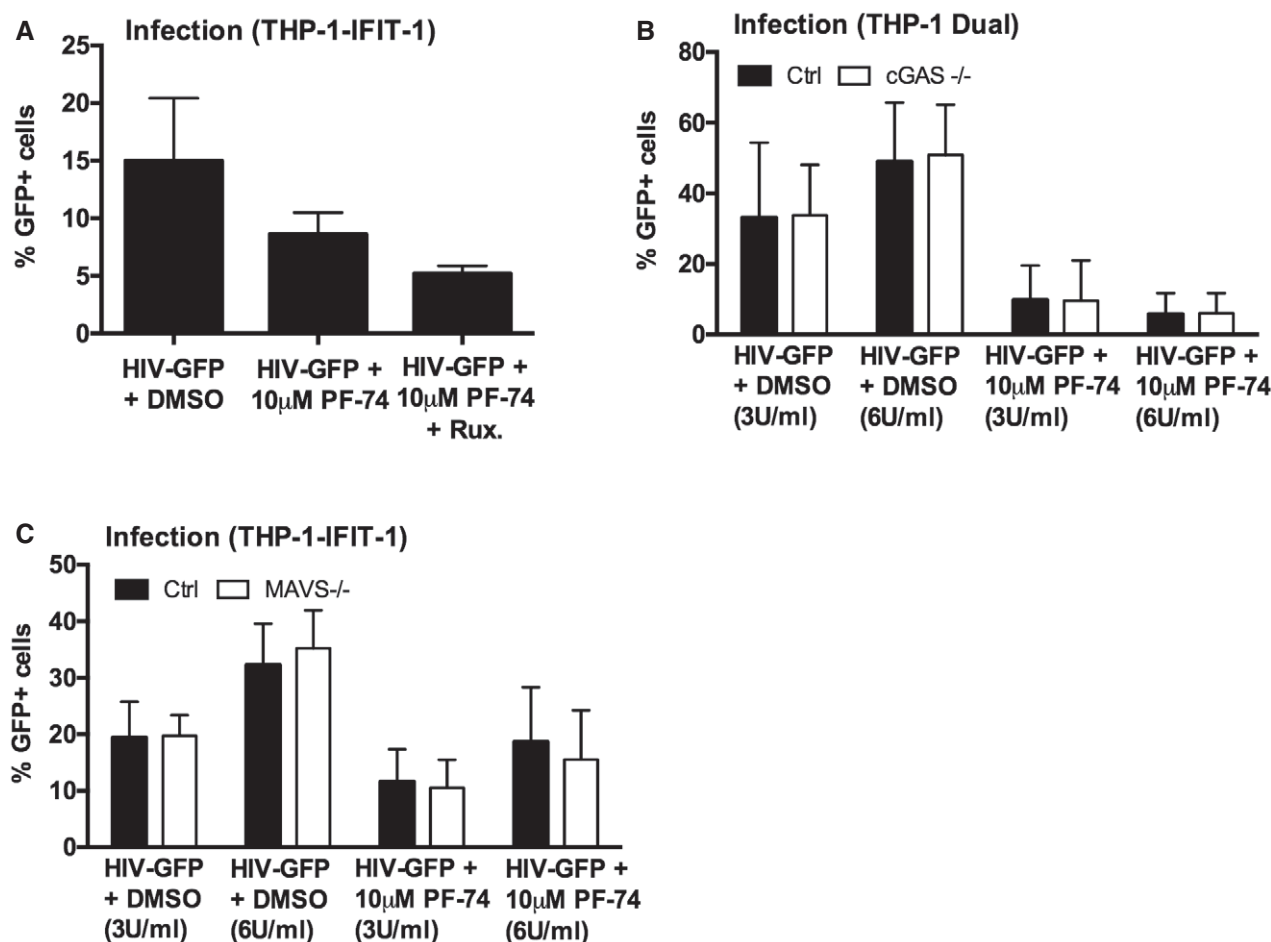

**Figure EV5. PF-74 treatment induces HIV-1 to trigger a DNA sensing-dependent ISG response.**

- A Infection data from Fig 6F. THP-1-IFIT-1 cells transduced for 48 h with HIV-1 GFP (3 U/ml RT) in the presence of DMSO control or PF-74 (10  $\mu$ M) and ruxolitinib (Rux, 2  $\mu$ M) as indicated.
- B Infection data from Fig 6G. THP-1 Dual shSAMHD1 cells lacking cGAS or a matching control (Ctrl) cell line transduced for 48 h with HIV-1 GFP (3 and 6 U/ml) in the presence of DMSO vehicle or PF-74 (10  $\mu$ M).
- C Infection data from Fig 6H. THP-1-IFIT-1 cells lacking MAVS or a matching gRNA control (Ctrl) cell line transduced for 48 h with HIV-1 GFP (3 and 6 U/ml) in the presence of DMSO vehicle or PF-74 (10  $\mu$ M).

Data information: Data are mean  $\pm$  SD,  $n$  = 2 (B), 3 (A) or 4 (C), representative of 3 repeats.
